# Supplementary material for: The influence of γ-AlOOH morphology on composite separator performance for lithium-ion batteries
Source: Royal Society of Chemistry journal article supplement (doi:10.1039/d5nj04599a), 2026-01-01
Supplement: d5nj04599a1.pdf [file d5nj04599a1.pdf]

## **Supporting Information**

### **Influence of $\gamma$ -AlOOH Morphology on Composite Separator**

#### **Performance for Lithium-Ion Batteries**

Xianghai Li, Xiaxia Yang, Shiyu Yan, Xiangyue Liu, Gang Yang\*

State Key Laboratory of Materials-Oriented Chemical Engineering College of  
Chemical Engineering, Nanjing Tech University, No. 30 Puzhu South Road, Nanjing  
211816, China

\*Corresponding author. E-mail address: [yanggang@njtech.edu.cn](mailto:yanggang@njtech.edu.cn)

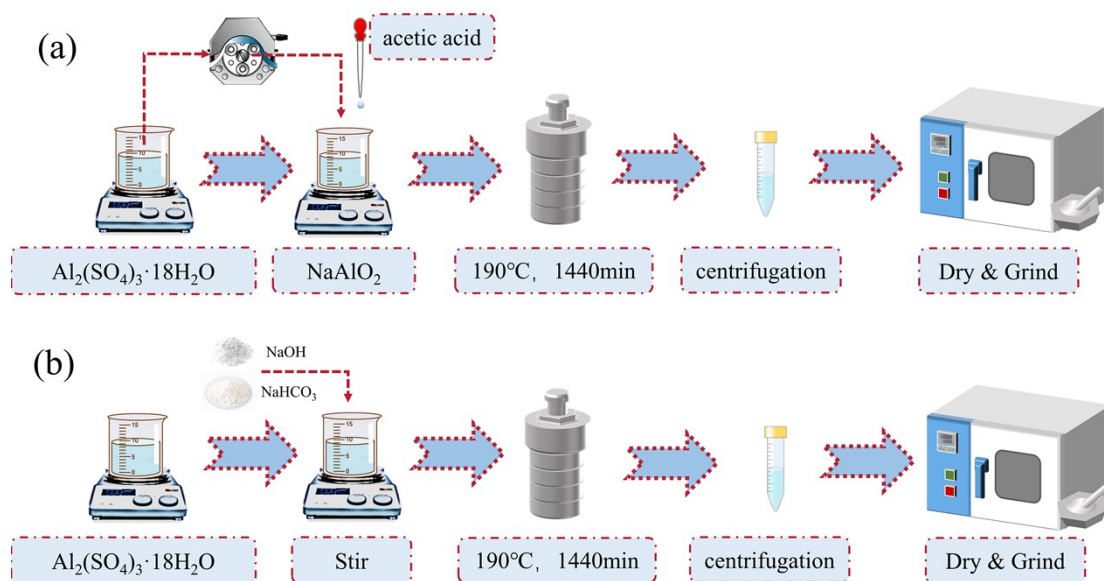

Figure S1 Preparation of  $\gamma$ -AlOOH with Different Morphology: (a)  $\gamma$ -AlOOH nanorods, (b)  $\gamma$ -AlOOH nanosheets

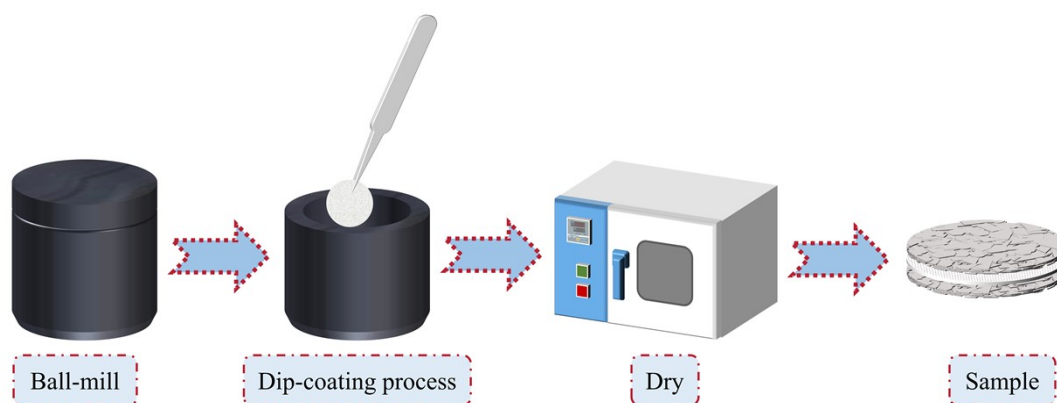

Figure S2 Preparation of  $\gamma$ -AlOOH-coated Celgard separator

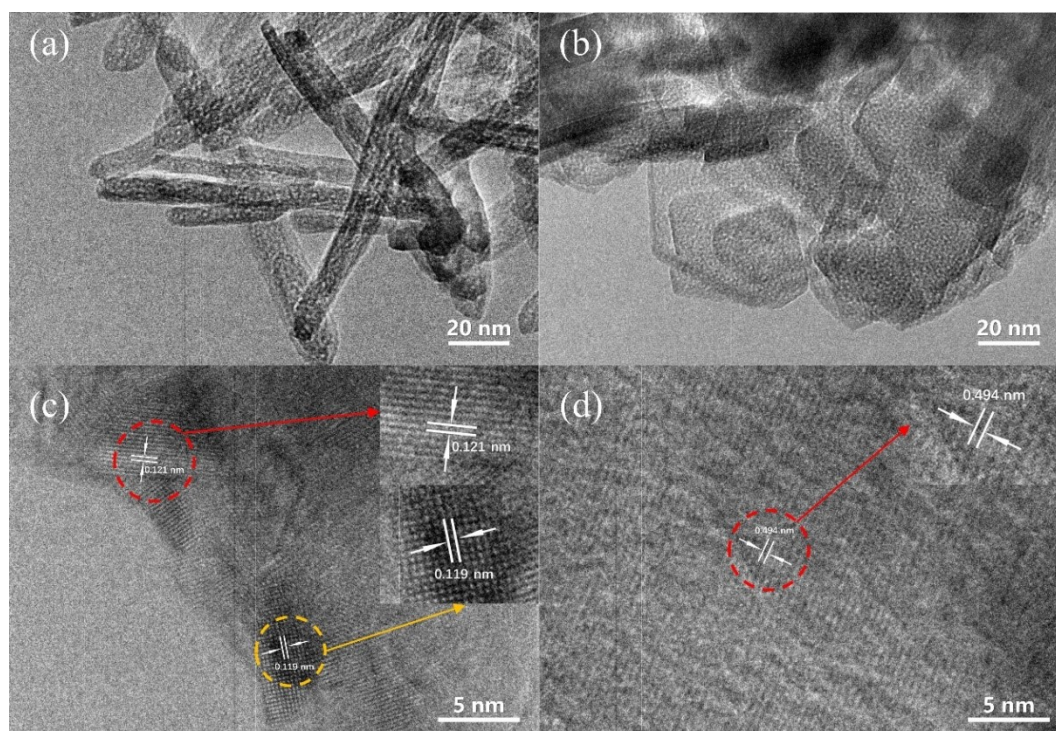

Figure S3. TEM and HRTEM images of  $\gamma$ -AlOOH with different morphologies: (a, c)  $\gamma$ -AlOOH nanorod, (b, d)  $\gamma$ -AlOOH nanosheet

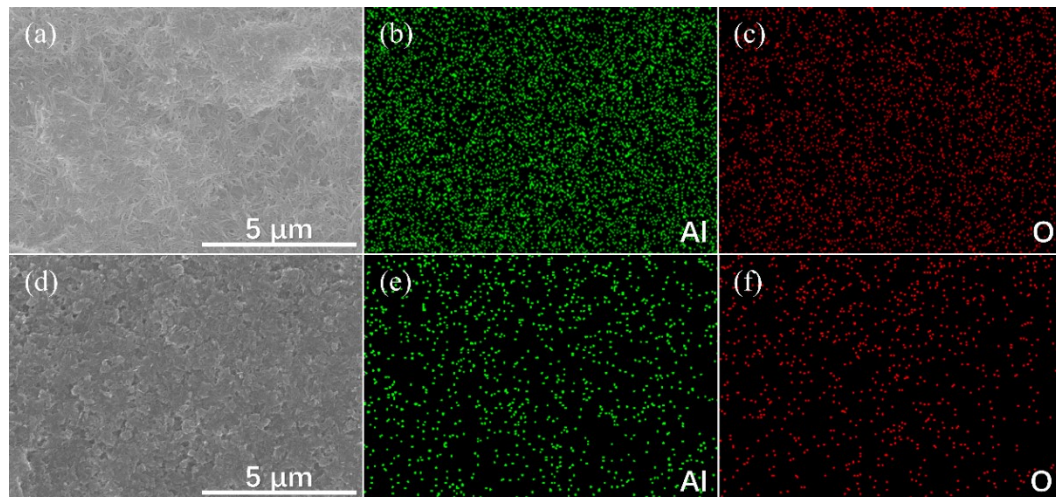

Figure S4 EDS elemental mapping of the  $\gamma$ -AlOOH-coated separators: (a-c) Celgard2325-nanorod, (d-f) Celgard2325-nanosheet



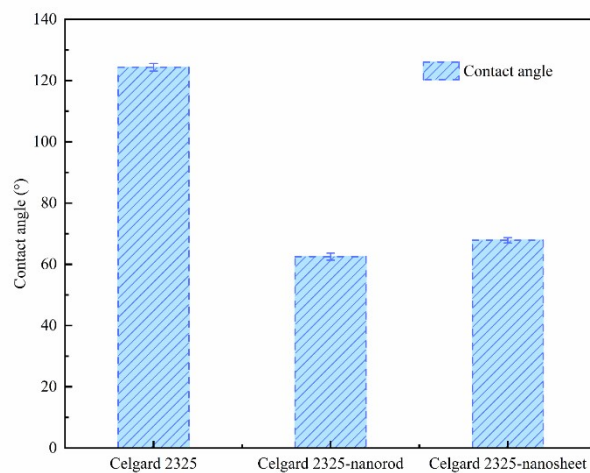

Figure S5 Electrolyte wettability of different separators

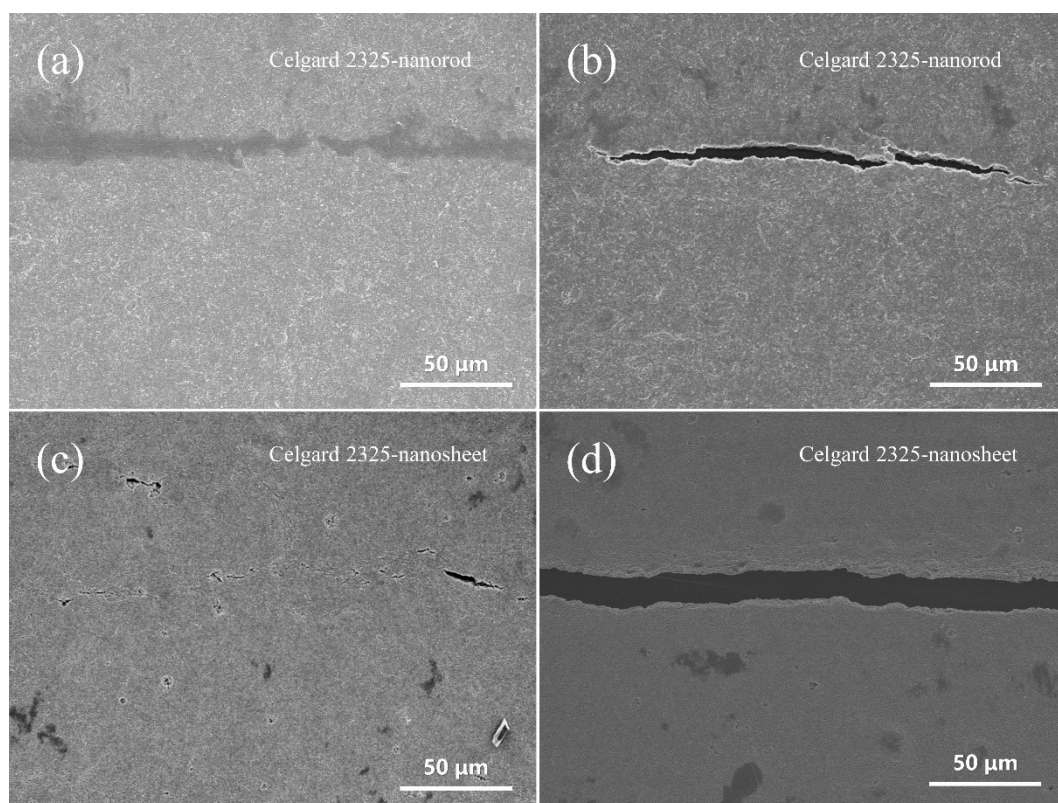

Figure S6 Repeated folding test of the separators: (a, c)100 times, (b, d)300 times

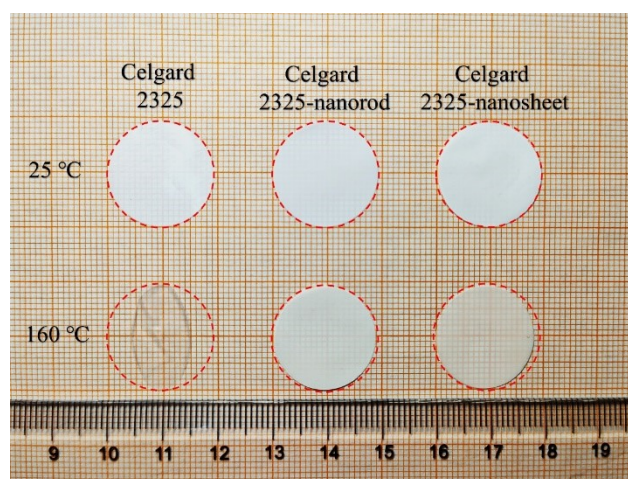

Figure S7 pictures after heat treatment at 25 °C, 160 °C for 1 h of separators.
